# Supplementary material for: Self-management interventions among community-dwelling older adults with type 2 diabetes mellitus: a scoping review protocol
Source: PubMed Central journal article supplement — BMJ Open. 2024 Aug 24;14(8):e084743. doi: 10.1136/bmjopen-2024-084743 (PMC11404239; doi:10.1136/bmjopen-2024-084743), 2024-08-24
Supplement: bmjopen-14-8-s001.pdf [file bmjopen-14-8-s001.pdf]

| Draft search strategy for MEDLINE (via PubMed) |                                                                                                                                                                                                                                                                                                                                                                                                                                                                                                                                                                                                                                                                                                                                                                                                                                                                                                                         |      |
|------------------------------------------------|-------------------------------------------------------------------------------------------------------------------------------------------------------------------------------------------------------------------------------------------------------------------------------------------------------------------------------------------------------------------------------------------------------------------------------------------------------------------------------------------------------------------------------------------------------------------------------------------------------------------------------------------------------------------------------------------------------------------------------------------------------------------------------------------------------------------------------------------------------------------------------------------------------------------------|------|
| Date                                           | Search String                                                                                                                                                                                                                                                                                                                                                                                                                                                                                                                                                                                                                                                                                                                                                                                                                                                                                                           | Hits |
| 4<br>March<br>2024                             | <p>Pubmed</p> <p>(Rehabilitation[mesh] OR rehabilitation[tiab] OR habilitation[tiab] OR “disease management”[MeSH] OR “disease management”[tiab] OR “self management”[tiab] OR 'self management'[MeSH Terms] OR 'self management'[Title/Abstract] OR 'self care'[Title/Abstract] OR 'Self Administration'[Title/Abstract] OR 'Blood Glucose'[Title/Abstract] OR 'Self-Monitoring'[Title/Abstract] OR 'Health Behaviour'[Title/Abstract] OR 'patient compliance'[Title/Abstract] OR 'Medication Adherence'[Title/Abstract]) AND ('diet'[Title/Abstract] OR 'diabetic'[Title/Abstract] OR 'Exercise'[Title/Abstract] OR ‘diabetes mellitus’[MeSH Terms] OR ‘diabetes mellitus’[Title/Abstract]) AND (‘Occupational Performance’[Title/Abstract] OR 'activities of daily living'[Title/Abstract] OR 'activities of daily living'[MeSH Terms]) AND (‘quality of life’[MeSH Terms] OR 'quality of life'[Title/Abstract])</p> | 3177 |
